# Supplementary material for: Electronic grade and flexible semiconductor film employing oriented attachment of colloidal ligand-free PbS and PbSe nanocrystals at room temperature
Source: Royal Society of Chemistry journal article supplement (doi:10.1039/c5nr01016k), 2015-01-01
Supplement: c5nr01016k1.pdf [file c5nr01016k1.pdf]

# **Electronic Grade and Flexible Semiconductor Film Employing Oriented Attachment of Colloidal Ligand-Free PbS and PbSe Nanocrystals at Room Temperature**

G. Shiva Shanker,<sup>a</sup> Abhishek Swarnkar,<sup>a</sup> Arindom Chatterjee,<sup>b</sup> S. Chakraborty,<sup>c</sup>

Manabjyoti Phukan,<sup>a</sup> Naziya Parveen,<sup>a</sup> Kanishka Biswas,<sup>b</sup> Angshuman Nag<sup>a,\*</sup>

<sup>a</sup>*Department of Chemistry, Indian Institute of Science Education and Research (IISER), Pune,  
411008, India.*

<sup>b</sup>*New Chemistry Unit and Sheikh Saqr Laboratory, Jawaharlal Nehru Centre for Advanced  
Scientific Research (JNCASR), Jakkur P.O., Bangalore 560 064, India*

<sup>c</sup>*Centre for Advanced Materials, Indian Association for the Cultivation of Science, Kolkata-  
700032, India*

\*Corresponding author's e-mail: [angshuman@iiserpune.ac.in](mailto:angshuman@iiserpune.ac.in)

**Electronic Supplementary Information (ESI)**

## Materials:

Lead (II) nitrate (sigma- aldrich, purity  $\geq 99\%$ ), formamide(FA, fluka analytical , purity 99.0%), ammonium sulphide (40 - 48 wt % solution in water, aldrich ), sodium selenide (alfa aesar, purity 99.8%), acetonitrile (dry, S D fine chem Ltd ), n-butanol (Analytical reagent, Rankem), ethanol (99.9% AR, S D fine chem Ltd), sodium chloride (AR, Rankem), colloidal silver liquid (TED PELLA, INC), polyethylene terephthalate (PET substrate, aldrich). All the chemicals were used without any further purification.

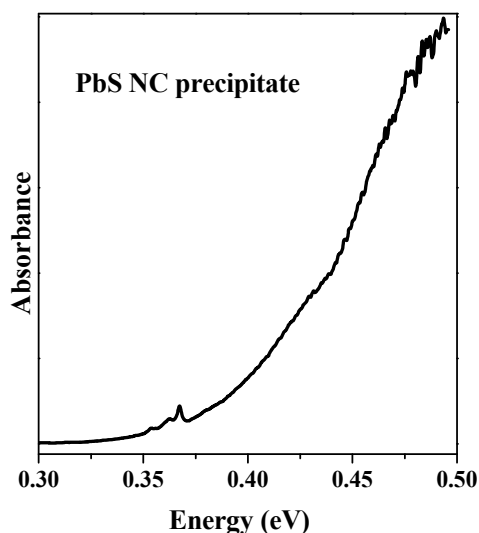

**Figure S1:** Infra-red absorption spectrum of PbS nanocrystal (NC) precipitate.

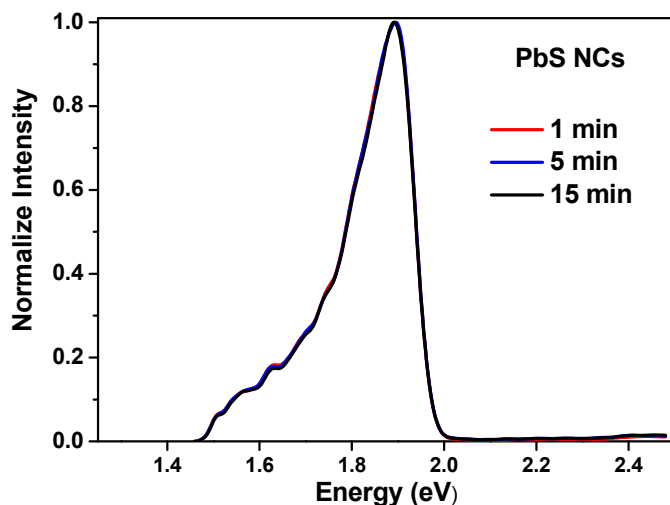

**Figure S2:** Photoluminescence (PL) spectra for same sample of ligand-free PbS nanocrystals (NCs) in FA at different time after stopping the reaction immediately after injecting  $S^{2-}$  solution in  $Pb^{2+}$  solution.

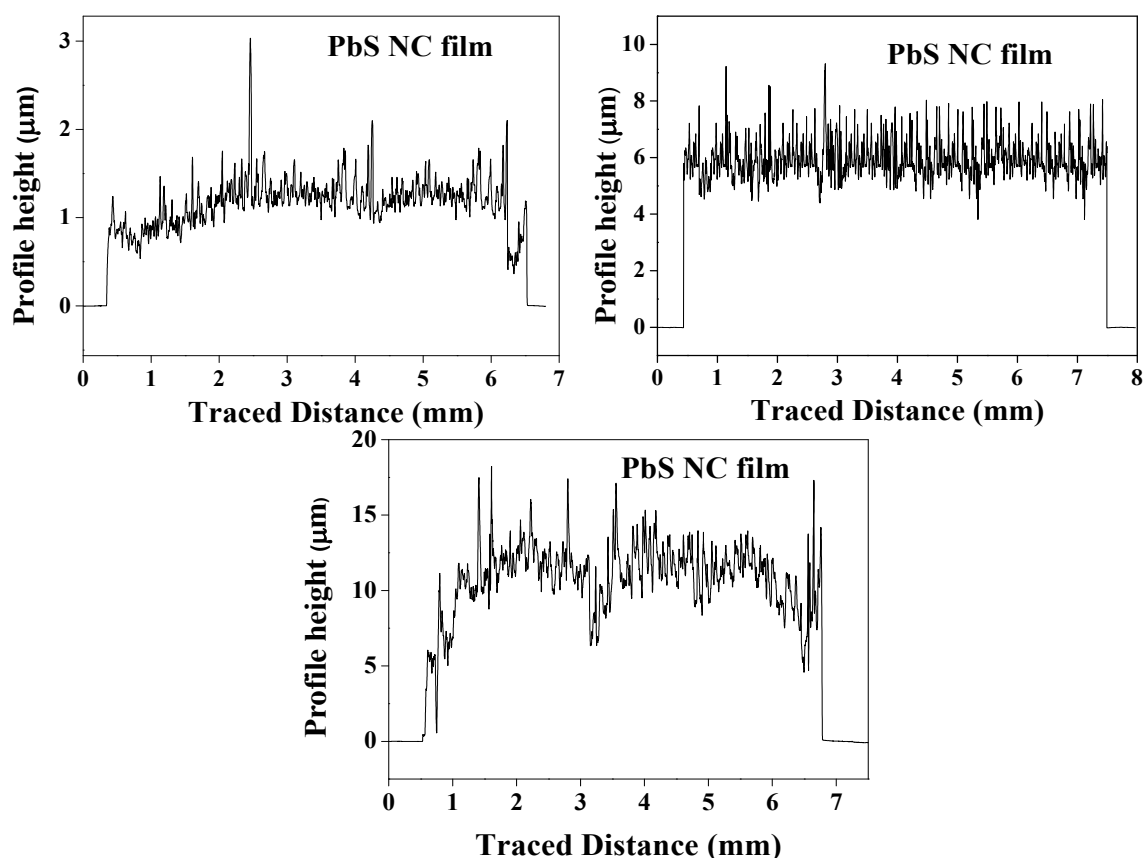

**Figure S3:** Surface profilometry of three different PbS films showing the control over film thickness in the range of 1 to 15  $\mu\text{m}$ .

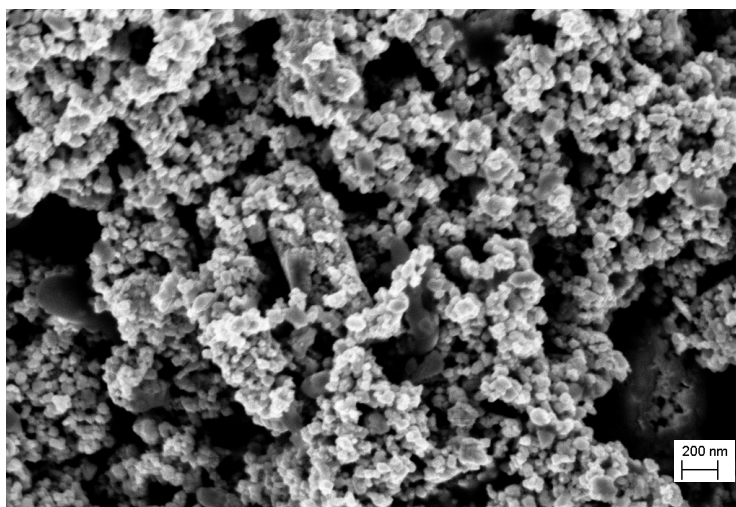

**Figure S4:** FESEM image of PbS NC film on glass substrate processed at 25  $^{\circ}\text{C}$ .

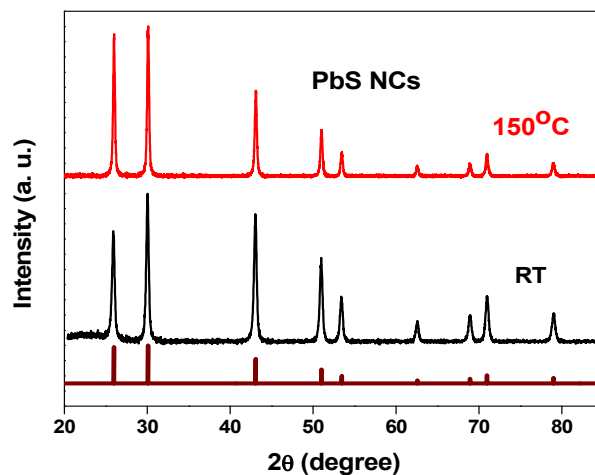

**Figure S5:** Powder x-ray diffraction (XRD) patterns of PbS NC films processed at room temperature (RT) and 150 °C.

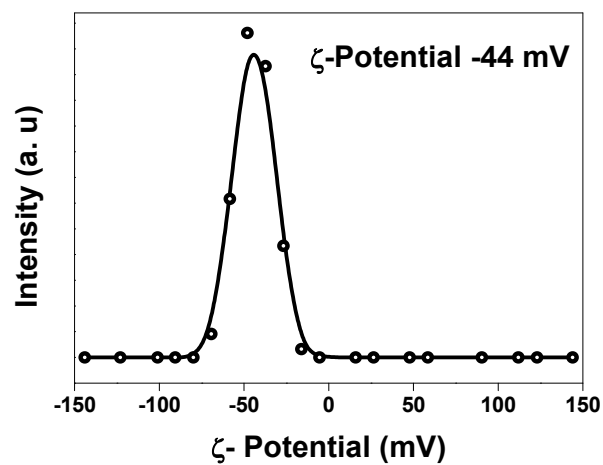

**Figure S6:** ζ-potential of ligand-free colloidal PbSe NCs dispersed in FA. Open circles represents the experimental data and the solid line is a guide to eye.

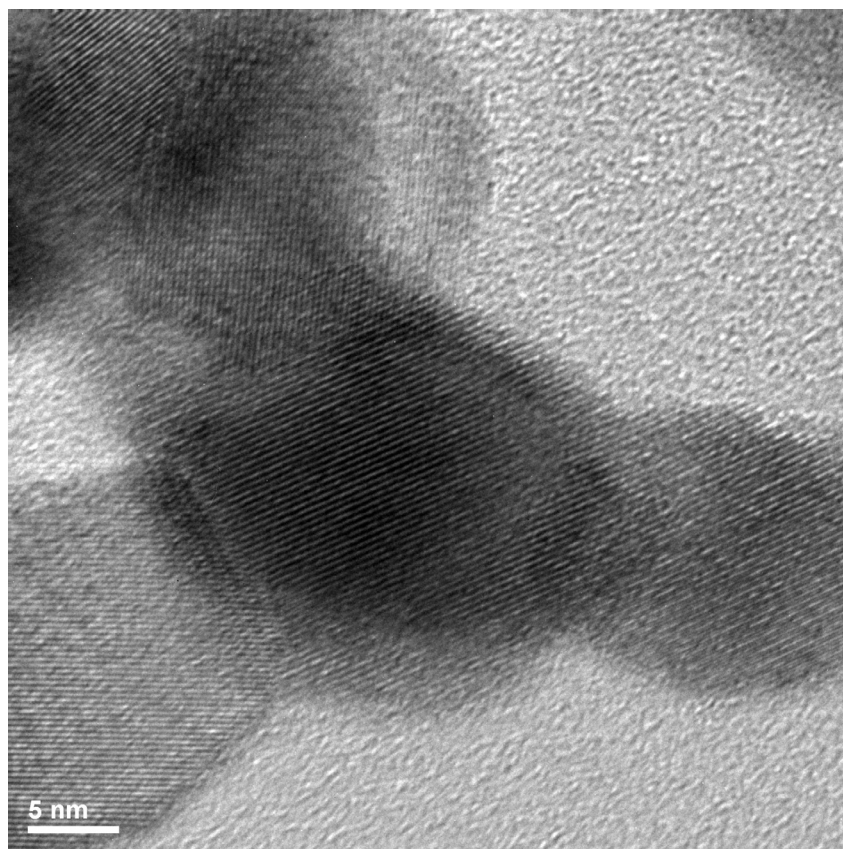

**Figure S7:** HRTEM image of ligand-free PbSe NC precipitate.

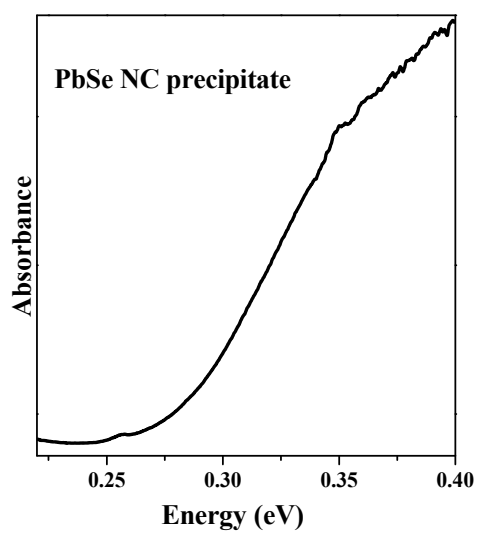

**Figure S8:** Infra-red absorption spectrum of PbSe nanocrystal (NC) precipitate.

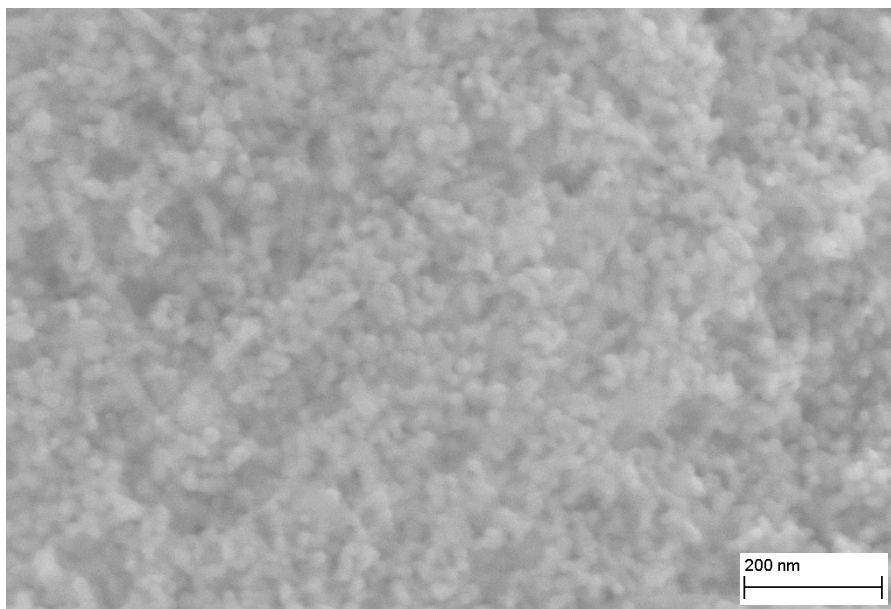

**Figure S9:** FESEM image of PbSe NC film on glass substrate processed at 25 °C.

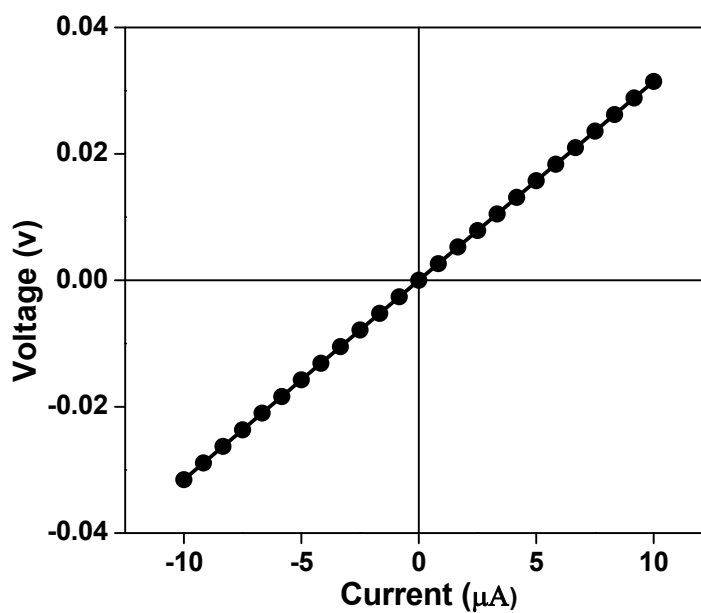

**Figure S10:** Four-probe Current (I) vs voltage (V) plot for PbSe NC film on glass substrate after annealing at 150 °C. Electrical measurement was done at room temperature.

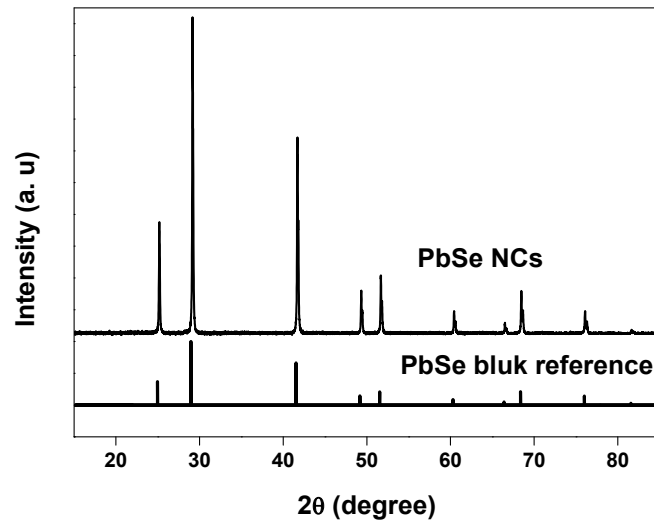

**Figure S11:** Powder XRD pattern of PbSe NC film after annealing at 150 °C.
